# Efficacy and safety of high-dose lisinopril in chronic heart failure patients at high cardiovascular risk, including those with diabetes mellitus

## Results from the ATLAS trial

L. Rydén<sup>1</sup>, P. W. Armstrong<sup>2</sup>, J. G. F. Cleland<sup>3</sup>, J. D. Horowitz<sup>4</sup>, B. M. Massie<sup>5</sup>, M. Packer<sup>6</sup> and P. A. Poole-Wilson<sup>7</sup> on behalf of the ATLAS Study Group

<sup>1</sup>Karolinska Institutet, Stockholm, Sweden; <sup>2</sup>University of Alberta, Edmonton, Canada; <sup>3</sup>University of Hull, U.K.; <sup>4</sup>University of Adelaide, Adelaide, Australia; <sup>5</sup>University of California, San Francisco, U.S.A.; <sup>6</sup>Columbia University, New York, U.S.A.; <sup>7</sup>Imperial College School of Medicine, University of London, U.K.

**Aims** An analysis was designed to determine whether chronic heart failure patients at high cardiovascular risk benefited to the same extent from high-dose lisinopril as the whole ATLAS population.

**Methods and Results** A retrospective analysis was performed on high-risk heart failure patients in the Assessment of Treatment with Lisinopril And Survival (ATLAS) trial (total number of patients 3164) comparing high-dose (32.5–35 mg · day<sup>-1</sup>) vs low-dose (2.5–5 mg · day<sup>-1</sup>) lisinopril for a median of 46 months. These high-risk patients included those with hypotension, hyponatraemia, compromised renal function, the elderly and patients with diabetes mellitus at baseline. In the whole study population, high-dose lisinopril led to a trend in risk reduction of all-cause mortality (primary end-point  $P=0.128$ ) and a significant risk reduction in all-cause mortality plus hospitalization (principal secondary end-point  $P=0.002$ ). Subgroup analyses were performed for these end-points. There were no consistent interactions between age, baseline

sodium, creatinine or potassium values, and treatment effect. Diabetics showed a beneficial response to high-dose therapy that was at least as good as that in non-diabetics. The underlying higher morbidity/mortality rates in diabetics mean that high-dose lisinopril has potential for a larger absolute clinical impact in these patients.

**Conclusion** Long-term high-dose lisinopril was as effective and well-tolerated in high-risk patients, including those with diabetes mellitus, as for the ATLAS study population as a whole.

(*Eur Heart J* 2000; 21: 1967–1978, doi:10.1053/euhj.2000.2311)

© 2000 The European Society of Cardiology

**Key Words:** Heart failure, ACE inhibitor, mortality, hospitalization, lisinopril, diabetes mellitus.

See page 1902 for the Editorial comment on this article

## Introduction

The beneficial effects of angiotensin-converting enzyme (ACE) inhibitors on morbidity and mortality in patients with chronic heart failure have been well documented in several major clinical trials (Cooperative New Scandinavian Enalapril Survival Study [CONSENSUS]<sup>[1]</sup>, Vasodilator Heart failure Trial I

[V-HeFT I]<sup>[2]</sup>, Studies of Left Ventricular Dysfunction [SOLVD] treatment<sup>[3]</sup>, Acute Infarction Ramipril Efficacy study [AIRE]<sup>[4]</sup>). However, the doses of ACE inhibitors used in these trials were considerably higher than those routinely prescribed in clinical practice<sup>[5,6]</sup>. Hence, the Assessment of Treatment with Lisinopril And Survival (ATLAS) trial examined whether the long-term administration of a 'high', trial-based dose of the ACE inhibitor lisinopril would confer additional benefits to those seen with a 'low' dose more typical of clinical practice. This study showed that patients receiving high-dose lisinopril compared with low-dose lisinopril had an 8% reduction in the risk of all-cause

Revision submitted 20 June 2000, and accepted 21 June 2000.

*Correspondence:* Lars Rydén MD, Professor of Cardiology, Department of Cardiology, Karolinska Sjukhuset, S-171 76 Stockholm, Sweden.

mortality ( $P=0.128$ ), a 12% lower risk for the combined end-point of death or hospitalization for any reason ( $P=0.002$ ), and a 15% lower risk for mortality or hospitalization for heart failure ( $P<0.001$ )<sup>[7]</sup>. Although the overall frequency of adverse events was similar between treatment groups, patients in the high-dose group had somewhat more hypotension and renal insufficiency than those in the low-dose group; these were usually managed by therapy adjustments and seldom led to withdrawal. The number of patients withdrawn from the study was similar in the two treatment groups (data on file).

There are several groups of heart failure patients at high cardiovascular risk<sup>[8,9]</sup>, including those unable to tolerate pharmacological therapy, the elderly, and those with hypotension, hyponatraemia or compromised renal function<sup>[10–13]</sup>. Management of these subjects, particularly during upward dose titration, requires careful monitoring. It is reasonable to believe that physicians may be particularly hesitant to prescribe these patients high-dose ACE inhibitors, because of the perceived likelihood of adverse effects. Additionally, diabetes mellitus is present in about one-third of patients with heart failure<sup>[14]</sup>, and is associated with increased renal dysfunction, higher mortality and an increased rate of hospitalizations.

The ATLAS database offers a unique opportunity to examine the efficacy and tolerability of high-doses of lisinopril in clinically relevant subgroups of heart failure patients, including those with diabetes, to provide useful information for the practising physician in charge of a mixed population of heart failure patients.

## Materials and methods

Detailed descriptions of the ATLAS trial and its patient population have been given elsewhere<sup>[7,15,16]</sup>. In brief, the ATLAS trial recruited 3793 patients with New York Heart Association (NYHA) Class II–IV heart failure. Patients intolerant to ACE inhibitors or with serum creatinine  $>2.5 \text{ mg} \cdot \text{dl}^{-1}$  ( $221 \mu\text{mol} \cdot \text{l}^{-1}$ ) were not included. Patients were titrated over 4 weeks to an open-label dose of 12.5 or 15 mg lisinopril. The 3164 patients who completed this initial phase were randomized to low-dose (2.5 or 5.0 mg  $\cdot \text{day}^{-1}$ ) or high-dose (32.5 or 35 mg  $\cdot \text{day}^{-1}$ ) lisinopril and followed up for a minimum of 36 months (median 46 months).

The primary study end-point was all-cause mortality, with secondary end-points of combined all-cause mortality and all-cause hospitalization (principal secondary end-point), cardiovascular mortality, combined all-cause mortality and cardiovascular hospitalization, combined cardiovascular mortality and cardiovascular hospitalization and combined myocardial infarctions (fatal and non-fatal) plus hospitalization for unstable angina.

Subgroups analysed are shown in Figs 1, 2 and 3. Those considered to be at high cardiovascular risk or having reduced tolerability to high doses of an ACE

inhibitor included patients with; hypotension, hyponatraemia, compromised renal function, diabetes mellitus at baseline (defined as concurrent use of antidiabetic medication) and the elderly<sup>[10–13]</sup>.

## Statistical methods

Subgroup analyses were performed for the pre-specified primary and principal secondary end-points only: all-cause mortality, and all-cause mortality plus all-cause hospitalizations. These were considered to provide an overall measure of treatment effect.

Survival analysis techniques, which account for censoring of data and make use of time-to-event information, were used on an intention-to-treat basis with adjustment for NYHA class and ejection fraction at baseline. In the analysis, cardiac transplantations were considered to be the same as cardiovascular deaths. For each subgroup, a hazard ratio for high-dose lisinopril compared with low-dose lisinopril was computed by including a term for the subgroup and the interaction between the subgroup and treatment in the Cox proportional hazards model. Hazard ratios of less than 1 indicate a risk reduction in the high-dose lisinopril group. 95% confidence intervals and the  $P$ -value of the interaction were used to identify differences in response.

## Results

### *The total patient population*

Of the 3164 randomized patients, 1568 were assigned to high-dose and 1596 to low-dose lisinopril therapy<sup>[7]</sup>. The target dose of study medication was achieved in more than 90% of patients, with mean daily lisinopril doses of 33.2 mg and 4.5 mg in the high and low-dose groups respectively, at the end of the dose titration period. Median duration of follow-up in surviving patients was 46 months; none were lost to follow-up.

There were 666 deaths (42%) in the high-dose group and 717 (45%) in the low-dose group. This corresponds to an 8% mortality risk reduction with high-dose lisinopril (96.1% confidence interval (CI)  $-18\%$  to  $+3\%$ ;  $P=0.128$ ). The combined risk of mortality and hospitalization for any reason was significantly lower in the high-dose group (1250 events) than in the low-dose group (1338 events; risk reduction 12%, 95% CI  $-5\%$  to  $-18\%$ ,  $P=0.002$ ).

### *Subgroup data*

The influence of baseline characteristics and laboratory findings is shown in Fig. 1 and Table 1. There was no

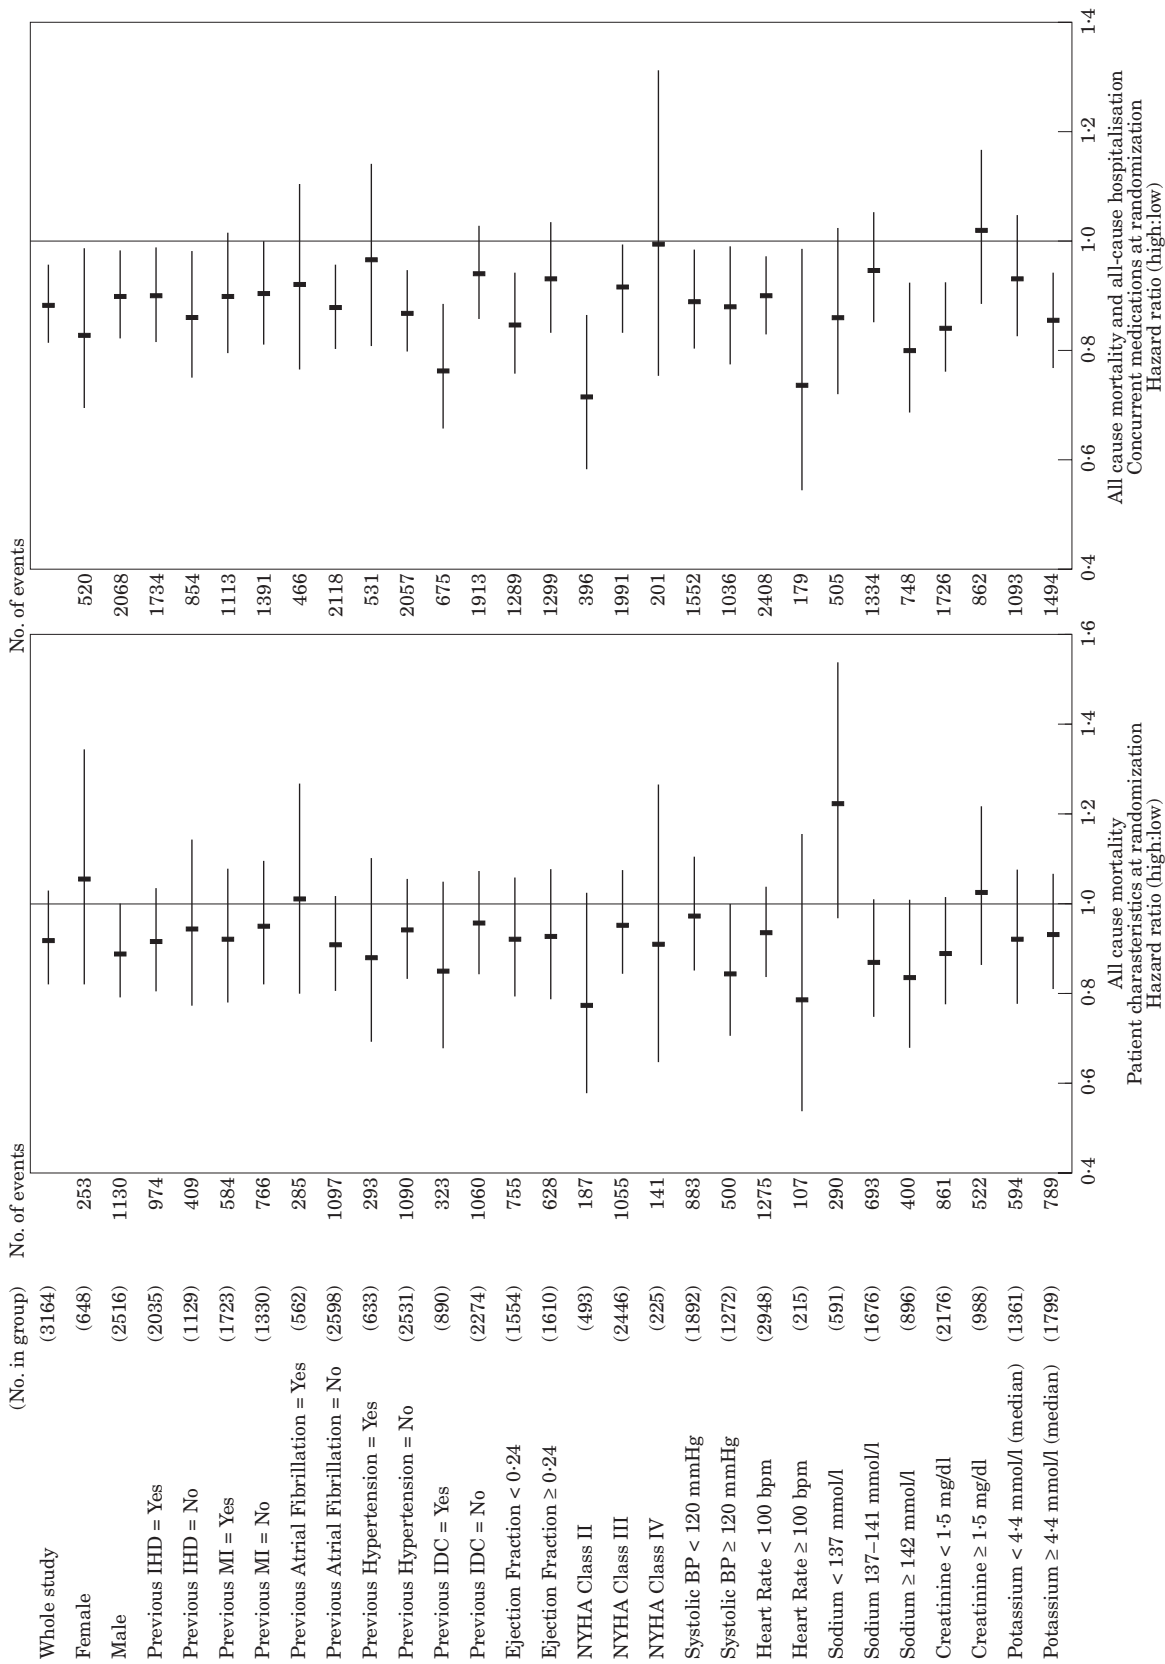

**Figure 1** All-cause mortality and the combined end-point of all-cause mortality and all-cause hospitalization for the whole study populations and subgroups (including number in subgroup and number of events) are shown, with hazards ratio (high dose : low dose) on the vertical axis. Values under 1.0 indicate superiority of high-dose lisinopril over low dose. Vertical bars represent the 95% confidence intervals for hazard ratio, except for the whole study result for all-cause mortality, where the 96-1% confidence interval is shown (as a result of the pre-planned interim analyses performed for this end-point). IHD = ischaemic heart disease; MI = myocardial infarction; IDC = idiopathic dilated cardiomyopathy.

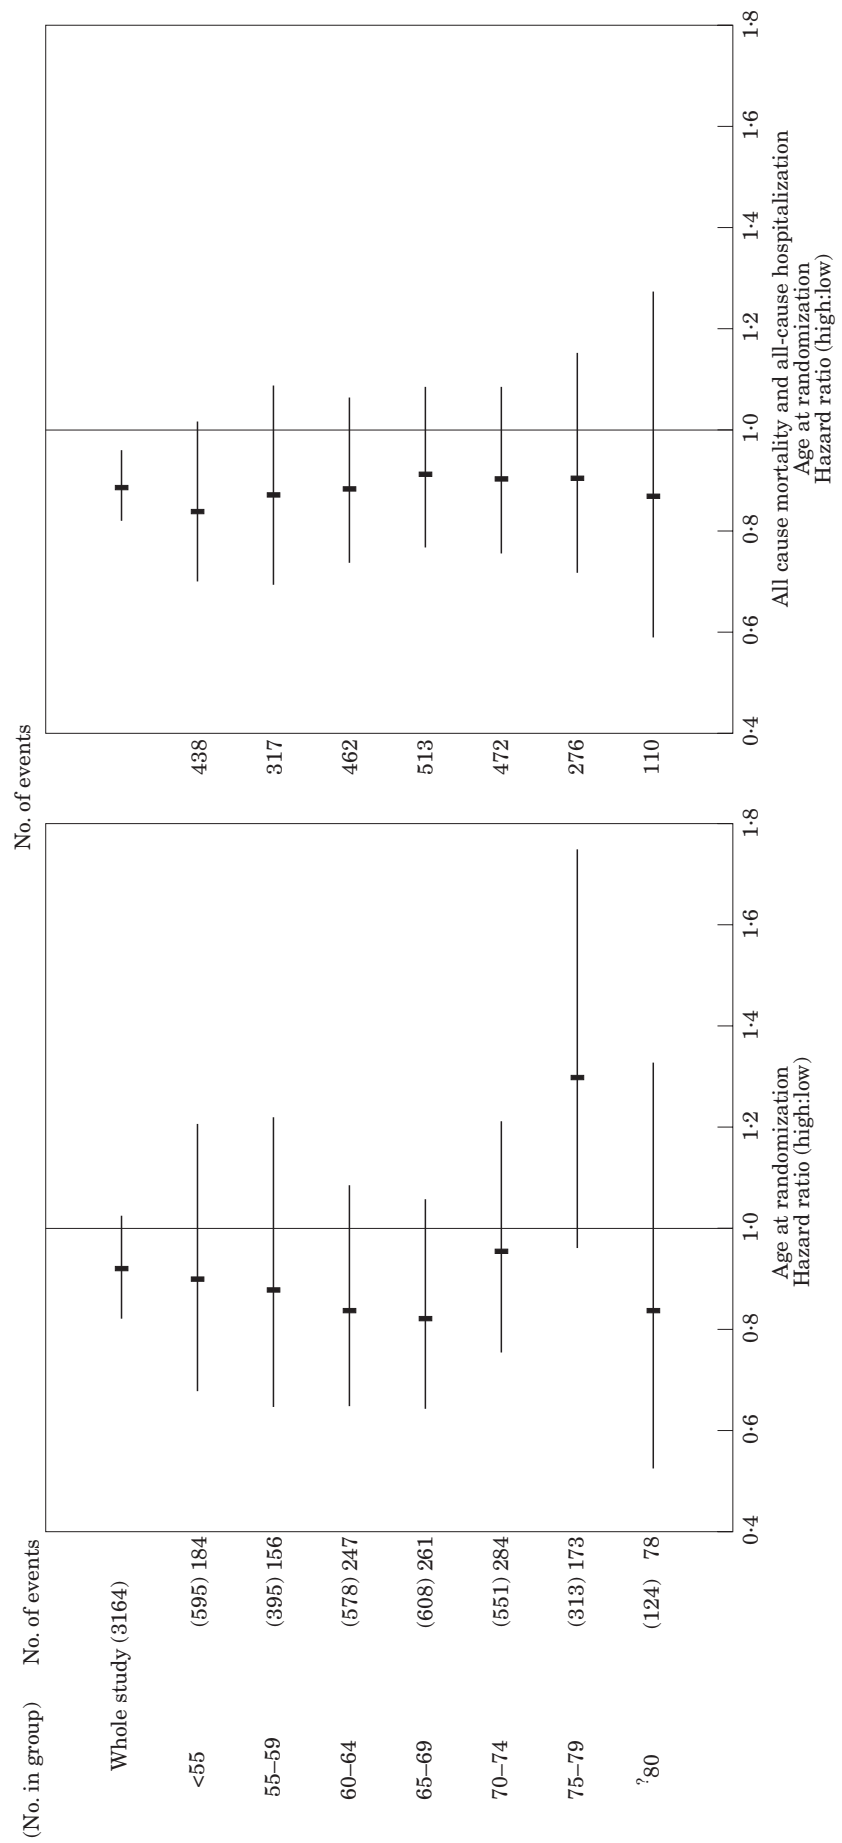

**Figure 2** Treatment effect of high-dose vs low-dose lisinopril for subgroups by age in 5-year bands for all-cause mortality and mortality plus hospitalization. Numbers in brackets indicate number in subgroup; number of events is also shown. Hazard ratios for high-dose vs low-dose and their 95% confidence intervals are shown.

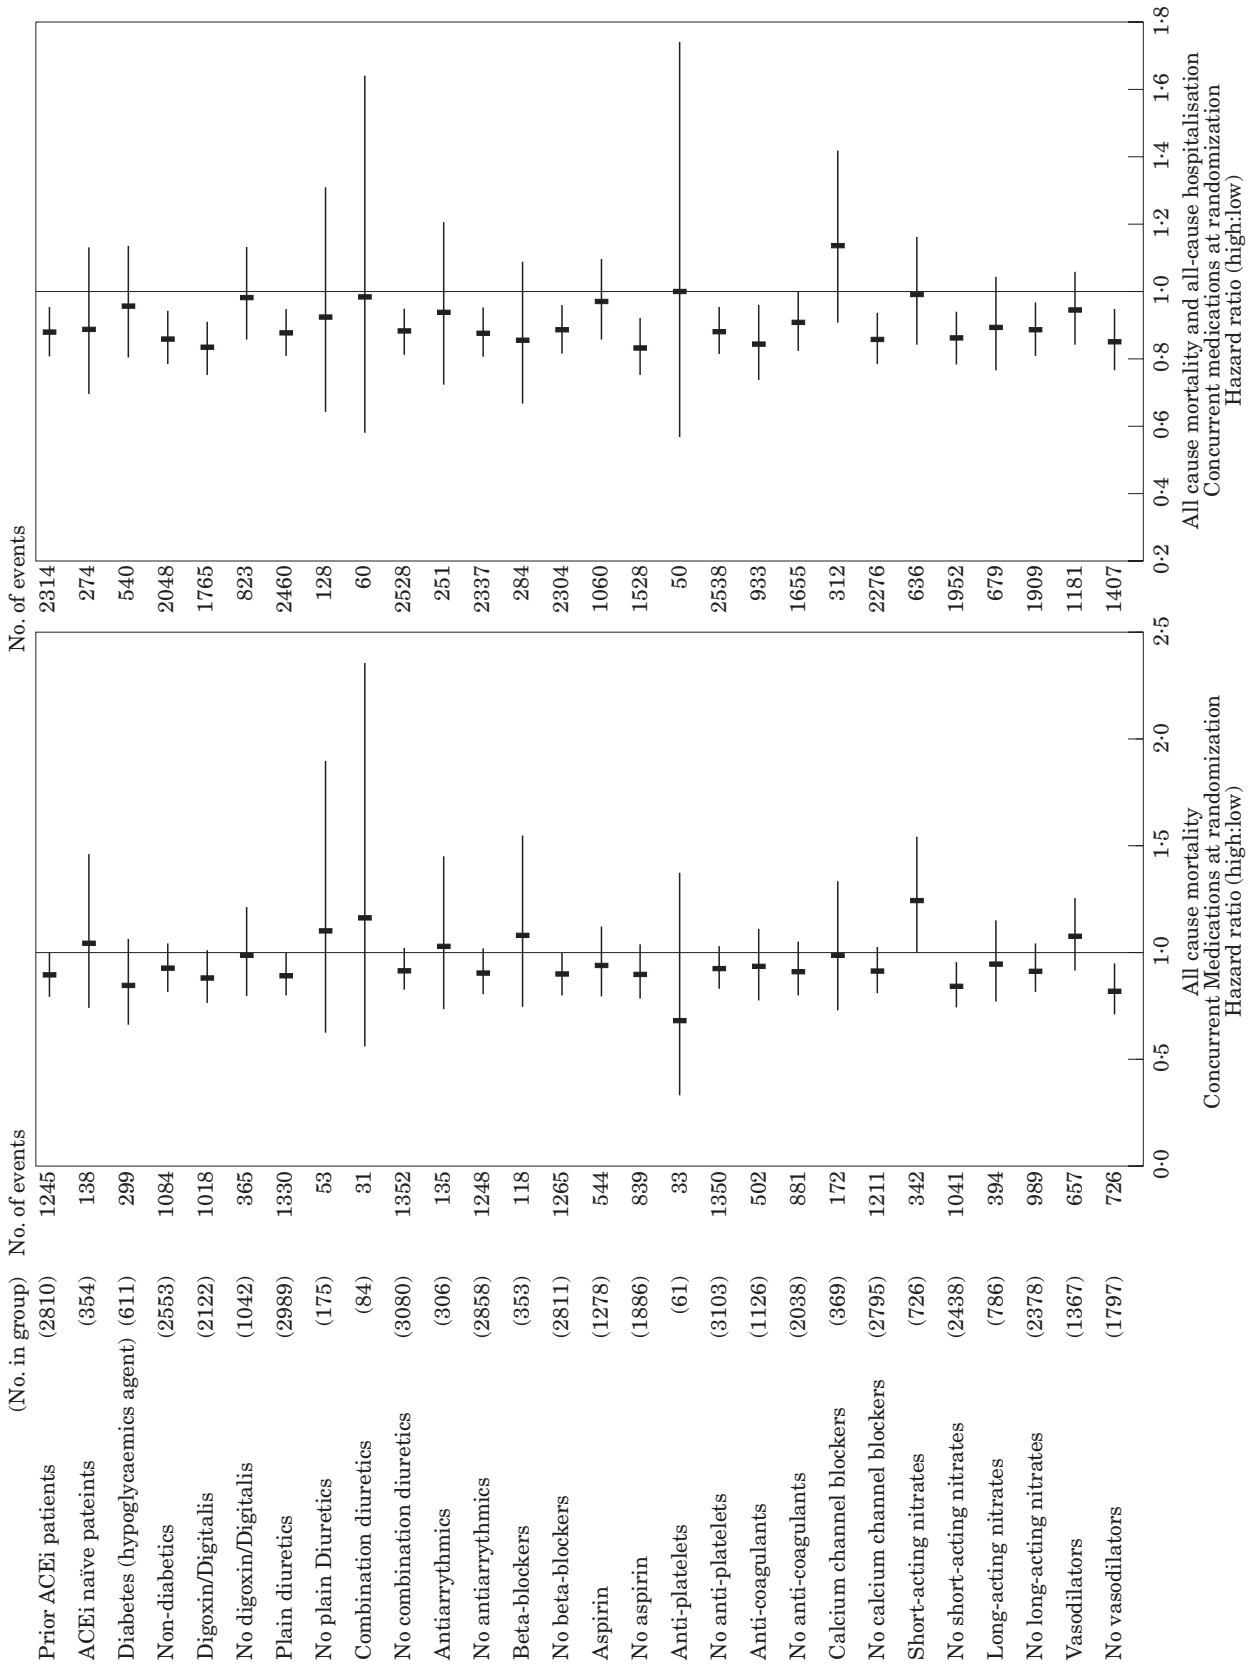

**Figure 3** Treatment effect of high-dose vs low-dose lisinopril for different concurrent treatments at the time of randomization for all-cause mortality, and all-cause mortality and all-cause hospitalisation. Numbers in brackets indicate number in subgroup; number of events is also shown.

**Table 1 All-cause mortality and all-cause mortality plus hospitalization: 95% confidence intervals and hazard ratios**

| Events (n)                                        | n    | All-cause mortality                            | Lower 95% | Upper 95% | HR    | P-value | Interaction |
|---------------------------------------------------|------|------------------------------------------------|-----------|-----------|-------|---------|-------------|
|                                                   | 3164 | Whole study*                                   | 0.824     | 1.030     | 0.921 | 0.128   |             |
| 253                                               | 648  | Female                                         | 0.824     | 1.348     | 1.054 | 0.677   | 0.228       |
| 1130                                              | 2516 | Male                                           | 0.793     | 1.001     | 0.891 | 0.053   |             |
| 974                                               | 2035 | Previous ischaemic heart disease=Yes           | 0.807     | 1.038     | 0.916 | 0.170   | 0.808       |
| 409                                               | 1129 | Previous ischaemic heart disease=No            | 0.776     | 1.144     | 0.942 | 0.547   |             |
| 584                                               | 1330 | Previous myocardial infarction=Yes             | 0.780     | 1.080     | 0.918 | 0.301   | 0.742       |
| 766                                               | 1723 | Previous myocardial infarction=No              | 0.826     | 1.097     | 0.952 | 0.494   |             |
| 285                                               | 562  | Previous atrial fibrillation=Yes               | 0.798     | 1.270     | 1.006 | 0.955   | 0.425       |
| 1097                                              | 2598 | Previous atrial fibrillation=No                | 0.804     | 1.019     | 0.905 | 0.100   |             |
| 293                                               | 633  | Previous hypertension=Yes                      | 0.695     | 1.103     | 0.876 | 0.260   | 0.612       |
| 1090                                              | 2531 | Previous hypertension=No                       | 0.832     | 1.055     | 0.937 | 0.281   |             |
| 323                                               | 890  | Previous idiopathic dilated cardiomyopathy=Yes | 0.680     | 1.053     | 0.846 | 0.134   | 0.351       |
| 1060                                              | 2274 | Previous idiopathic dilated cardiomyopathy=No  | 0.844     | 1.075     | 0.953 | 0.431   |             |
| 755                                               | 1554 | Ejection fraction <0.24                        | 0.797     | 1.060     | 0.919 | 0.247   | 0.962       |
| 628                                               | 1610 | Ejection fraction ≥0.24                        | 0.790     | 1.081     | 0.924 | 0.322   |             |
| 187                                               | 493  | NYHA Class II                                  | 0.579     | 1.028     | 0.771 | 0.076   |             |
| 1055                                              | 2446 | NYHA Class III                                 | 0.844     | 1.075     | 0.952 | 0.433   | 0.184       |
| 141                                               | 225  | NYHA Class IV                                  | 0.652     | 1.263     | 0.907 | 0.564   | 0.467       |
| 883                                               | 1892 | Systolic BP <120 mmHg                          | 0.850     | 1.107     | 0.970 | 0.651   | 0.201       |
| 500                                               | 1272 | Systolic BP ≥120 mmHg                          | 0.705     | 1.002     | 0.840 | 0.053   |             |
| 1275                                              | 2948 | Heart rate <100 beats . min <sup>-1</sup>      | 0.836     | 1.041     | 0.933 | 0.216   | 0.393       |
| 107                                               | 215  | Heart rate ≥100 beats . min <sup>-1</sup>      | 0.535     | 1.150     | 0.784 | 0.214   |             |
| 290                                               | 591  | Sodium <137 mmol . l <sup>-1</sup>             | 0.967     | 1.535     | 1.218 | 0.095   |             |
| 693                                               | 1676 | Sodium 137–141 mmol . l <sup>-1</sup>          | 0.748     | 1.009     | 0.868 | 0.065   | 0.016       |
| 400                                               | 896  | Sodium ≥142 mmol . l <sup>-1</sup>             | 0.681     | 1.010     | 0.829 | 0.063   | 0.013       |
| 861                                               | 2176 | Creatinine <1.5 mg . dl <sup>-1</sup>          | 0.775     | 1.012     | 0.886 | 0.075   | 0.201       |
| 522                                               | 988  | Creatinine ≥1.5 mg . dl <sup>-1</sup>          | 0.860     | 1.212     | 1.021 | 0.815   |             |
| 594                                               | 1361 | Potassium <4.4 mmol . l <sup>-1</sup> (median) | 0.777     | 1.073     | 0.913 | 0.269   | 0.884       |
| 789                                               | 1799 | Potassium ≥4.4 mmol . l <sup>-1</sup> (median) | 0.807     | 1.067     | 0.927 | 0.291   |             |
| All-cause mortality and all-cause hospitalization |      |                                                |           |           |       |         |             |
|                                                   | 3164 | Whole study                                    | 0.818     | 0.955     | 0.884 | 0.002   |             |
| 520                                               | 648  | Female                                         | 0.698     | 0.985     | 0.829 | 0.033   | 0.410       |
| 2068                                              | 2516 | Male                                           | 0.824     | 0.980     | 0.899 | 0.016   |             |
| 1734                                              | 2035 | Previous ischaemic heart disease=Yes           | 0.818     | 0.988     | 0.899 | 0.027   | 0.595       |
| 854                                               | 1129 | Previous ischaemic heart disease=No            | 0.752     | 0.983     | 0.860 | 0.027   |             |
| 1113                                              | 1723 | Previous myocardial infarction=Yes             | 0.799     | 1.011     | 0.899 | 0.075   | 0.944       |
| 1391                                              | 1330 | Previous myocardial infarction=No              | 0.813     | 1.004     | 0.904 | 0.059   |             |
| 466                                               | 562  | Previous atrial fibrillation=Yes               | 0.766     | 1.102     | 0.919 | 0.359   | 0.650       |
| 2118                                              | 2598 | Previous atrial fibrillation=No                | 0.805     | 0.955     | 0.877 | 0.003   |             |
| 531                                               | 633  | Previous hypertension=Yes                      | 0.809     | 1.139     | 0.960 | 0.639   | 0.309       |
| 2057                                              | 2531 | Previous hypertension=No                       | 0.797     | 0.948     | 0.869 | 0.002   |             |
| 675                                               | 890  | Previous idiopathic dilated cardiomyopathy=Yes | 0.658     | 0.890     | 0.765 | 0.001   | 0.022       |
| 1913                                              | 2274 | Previous idiopathic dilated cardiomyopathy=No  | 0.859     | 1.028     | 0.939 | 0.173   |             |
| 1289                                              | 1554 | Ejection fraction <0.24                        | 0.756     | 0.941     | 0.844 | 0.002   | 0.236       |
| 1299                                              | 1610 | Ejection fraction ≥0.24                        | 0.831     | 1.033     | 0.926 | 0.169   |             |
| 396                                               | 493  | NYHA Class II                                  | 0.585     | 0.867     | 0.712 | 0.001   |             |
| 1991                                              | 2446 | NYHA Class III                                 | 0.835     | 0.996     | 0.912 | 0.040   | 0.025       |
| 201                                               | 225  | NYHA Class IV                                  | 0.754     | 1.312     | 0.994 | 0.970   | 0.054       |
| 1552                                              | 1892 | Systolic BP <120 mmHg                          | 0.804     | 0.981     | 0.888 | 0.020   | 0.885       |
| 1036                                              | 1272 | Systolic BP ≥120 mmHg                          | 0.777     | 0.992     | 0.878 | 0.037   |             |
| 2408                                              | 2948 | Heart rate <100 beats . min <sup>-1</sup>      | 0.827     | 0.971     | 0.896 | 0.007   | 0.204       |
| 179                                               | 215  | Heart rate ≥100 beats . min <sup>-1</sup>      | 0.546     | 0.988     | 0.734 | 0.041   |             |
| 505                                               | 591  | Sodium <137 mmol . l <sup>-1</sup>             | 0.721     | 1.023     | 0.859 | 0.088   |             |
| 1334                                              | 1676 | Sodium 137–141 mmol . l <sup>-1</sup>          | 0.847     | 1.050     | 0.943 | 0.283   | 0.372       |
| 748                                               | 896  | Sodium ≥142 mmol . l <sup>-1</sup>             | 0.690     | 0.920     | 0.797 | 0.002   | 0.515       |
| 1726                                              | 2176 | Creatinine <1.5 mg . dl <sup>-1</sup>          | 0.764     | 0.924     | 0.840 | 0.001   | 0.022       |
| 862                                               | 988  | Creatinine ≥1.5 mg . dl <sup>-1</sup>          | 0.890     | 1.164     | 1.018 | 0.794   |             |
| 1093                                              | 1361 | Potassium <4.4 mmol . l <sup>-1</sup> (median) | 0.823     | 1.045     | 0.927 | 0.214   | 0.294       |
| 1494                                              | 1799 | Potassium ≥4.4 mmol . l <sup>-1</sup> (median) | 0.770     | 0.944     | 0.853 | 0.002   |             |



Table 1 Continued

| Events (n)                                        | n    | All-cause mortality                                | Lower 95% | Upper 95% | HR    | P-value | Interaction |
|---------------------------------------------------|------|----------------------------------------------------|-----------|-----------|-------|---------|-------------|
| Concurrent medications at randomization           |      |                                                    |           |           |       |         |             |
| 1245                                              | 2810 | Prior ACE patients                                 | 0.812     | 1.014     | 0.907 | 0.086   | 0.404       |
| 138                                               | 354  | ACE naïve patients                                 | 0.755     | 1.471     | 1.054 | 0.759   |             |
| 299                                               | 611  | Diabetics (hypoglycaemics at randomization)        | 0.684     | 1.076     | 0.858 | 0.185   | 0.502       |
| 1084                                              | 2553 | Non-Diabetics (no hypoglycaemics at randomization) | 0.831     | 1.055     | 0.936 | 0.280   |             |
| 1018                                              | 2122 | Digoxin/Digitalis at randomization                 | 0.789     | 1.010     | 0.893 | 0.071   | 0.351       |
| 365                                               | 1042 | No digoxin/digitalis at randomization              | 0.815     | 1.228     | 1.000 | 0.998   |             |
| 1330                                              | 2989 | Plain diuretics at randomization                   | 0.821     | 1.018     | 0.914 | 0.102   | 0.475       |
| 53                                                | 175  | No plain diuretics at randomization                | 0.651     | 1.915     | 1.117 | 0.688   |             |
| 31                                                | 84   | Combination diuretics at randomization             | 0.574     | 2.364     | 1.165 | 0.672   | 0.511       |
| 1352                                              | 3080 | No combination diuretics at randomization          | 0.824     | 1.020     | 0.917 | 0.110   |             |
| 135                                               | 306  | Antiarrhythmics at randomization                   | 0.737     | 1.449     | 1.033 | 0.850   | 0.487       |
| 1248                                              | 2858 | No antiarrhythmics at randomization                | 0.815     | 1.018     | 0.911 | 0.098   |             |
| 118                                               | 353  | Betablockers at randomization                      | 0.751     | 1.552     | 1.079 | 0.681   | 0.344       |
| 1265                                              | 2811 | No betablockers at randomization                   | 0.805     | 1.003     | 0.898 | 0.057   |             |
| 544                                               | 1278 | Aspirin at randomization                           | 0.799     | 1.118     | 0.945 | 0.511   | 0.702       |
| 839                                               | 1886 | No aspirin at randomization                        | 0.791     | 1.038     | 0.906 | 0.154   |             |
| 33                                                | 61   | Antiplatelets at randomization                     | 0.344     | 1.368     | 0.686 | 0.285   | 0.398       |
| 1350                                              | 3103 | No antiplatelets at randomization                  | 0.834     | 1.032     | 0.928 | 0.168   |             |
| 502                                               | 1126 | Anti-coagulants at randomization                   | 0.782     | 1.109     | 0.931 | 0.425   | 0.881       |
| 881                                               | 2038 | No anti-coagulants at randomization                | 0.802     | 1.045     | 0.916 | 0.192   |             |
| 172                                               | 369  | Calcium channel blockers at randomization          | 0.735     | 1.338     | 0.992 | 0.958   | 0.606       |
| 1211                                              | 2795 | No calcium channel blockers at randomization       | 0.815     | 1.021     | 0.912 | 0.109   |             |
| 342                                               | 726  | Short-acting nitrates at randomization             | 1.003     | 1.533     | 1.240 | 0.047   | 0.002       |
| 1041                                              | 2438 | No short-acting nitrates at randomization          | 0.744     | 0.949     | 0.840 | 0.005   |             |
| 394                                               | 786  | Long-acting nitrates at randomization              | 0.769     | 1.143     | 0.937 | 0.522   | 0.847       |
| 989                                               | 2378 | No long-acting nitrates at randomization           | 0.809     | 1.038     | 0.916 | 0.169   |             |
| 657                                               | 1367 | Vasodilators at randomization                      | 0.920     | 1.249     | 1.072 | 0.373   | 0.011       |
| 726                                               | 1797 | No vasodilators at randomization                   | 0.704     | 0.943     | 0.815 | 0.006   |             |
| All-cause mortality and all-cause hospitalization |      |                                                    |           |           |       |         |             |
| 2314                                              | 2810 | Prior ACE patients                                 | 0.814     | 0.959     | 0.883 | 0.003   | 0.939       |
| 274                                               | 354  | ACE naïve patients                                 | 0.704     | 1.131     | 0.892 | 0.345   |             |
| 540                                               | 611  | Diabetics (hypoglycaemics at randomization)        | 0.811     | 1.136     | 0.960 | 0.632   | 0.275       |
| 2048                                              | 2553 | Non-diabetics (no hypoglycaemics at randomization) | 0.791     | 0.942     | 0.863 | 0.001   |             |
| 1765                                              | 2122 | Digoxin/digitalis at randomization                 | 0.764     | 0.921     | 0.839 | 0.001   | 0.058       |
| 823                                               | 1042 | No digoxin/digitalis at randomization              | 0.858     | 1.128     | 0.984 | 0.819   |             |
| 2460                                              | 2989 | Plain diuretics at randomization                   | 0.815     | 0.955     | 0.882 | 0.002   | 0.789       |
| 128                                               | 175  | No plain diuretics at randomization                | 0.655     | 1.309     | 0.926 | 0.663   |             |
| 60                                                | 84   | Combination diuretics at randomization             | 0.594     | 1.637     | 0.986 | 0.956   | 0.672       |
| 2528                                              | 3080 | No combination diuretics at randomization          | 0.816     | 0.954     | 0.882 | 0.002   |             |
| 251                                               | 306  | Antiarrhythmics at randomization                   | 0.730     | 1.202     | 0.937 | 0.608   | 0.640       |
| 2337                                              | 2858 | No antiarrhythmics at randomization                | 0.811     | 0.955     | 0.880 | 0.002   |             |
| 284                                               | 353  | Betablockers at randomization                      | 0.674     | 1.081     | 0.854 | 0.189   | 0.766       |
| 2304                                              | 2811 | No betablockers at randomization                   | 0.817     | 0.962     | 0.887 | 0.004   |             |
| 1060                                              | 1278 | Aspirin at randomization                           | 0.858     | 1.093     | 0.969 | 0.604   | 0.056       |
| 1528                                              | 1886 | No aspirin at randomization                        | 0.752     | 0.919     | 0.831 | 0.001   |             |
| 50                                                | 61   | Antiplatelets at randomization                     | 0.572     | 1.735     | 0.997 | 0.991   | 0.669       |
| 2538                                              | 3103 | No antiplatelets at randomization                  | 0.816     | 0.954     | 0.882 | 0.002   |             |
| 933                                               | 1126 | Anti-coagulants at randomization                   | 0.742     | 0.960     | 0.844 | 0.010   | 0.376       |
| 1655                                              | 2038 | No anti-coagulants at randomization                | 0.824     | 0.999     | 0.907 | 0.048   |             |
| 312                                               | 369  | Calcium channel blockers at randomization          | 0.907     | 1.416     | 1.133 | 0.270   | 0.021       |
| 2276                                              | 2795 | No calcium channel blockers at randomization       | 0.789     | 0.930     | 0.857 | 0.001   |             |
| 636                                               | 726  | Short-acting nitrates at randomization             | 0.850     | 1.160     | 0.993 | 0.929   | 0.110       |
| 1952                                              | 2438 | No short-acting nitrates at randomization          | 0.785     | 0.938     | 0.858 | 0.001   |             |
| 679                                               | 786  | Long-acting nitrates at randomization              | 0.765     | 1.034     | 0.889 | 0.128   | 0.928       |
| 1909                                              | 2378 | No long-acting nitrates at randomization           | 0.806     | 0.965     | 0.882 | 0.006   |             |
| 1181                                              | 1367 | Vasodilators at randomization                      | 0.840     | 1.056     | 0.942 | 0.303   | 0.188       |
| 1407                                              | 1797 | No vasodilators at randomization                   | 0.764     | 0.942     | 0.848 | 0.002   |             |

Table 1 Continued

| No of events                                      | n    | Age         | HR    | Lower 95% | Upper 95% | P-value |
|---------------------------------------------------|------|-------------|-------|-----------|-----------|---------|
| All-cause mortality                               |      |             |       |           |           |         |
|                                                   | 3164 | Whole Study | 0.921 | 0.824     | 1.03      |         |
| 184                                               | 595  | <55         | 0.902 | 0.675     | 1.205     | 0.4854  |
| 156                                               | 395  | 55–59       | 0.884 | 0.642     | 1.216     | 0.4489  |
| 247                                               | 578  | 60–64       | 0.838 | 0.65      | 1.08      | 0.1727  |
| 261                                               | 608  | 65–69       | 0.825 | 0.646     | 1.053     | 0.1224  |
| 284                                               | 551  | 70–74       | 0.953 | 0.754     | 1.203     | 0.6838  |
| 173                                               | 313  | 75–79       | 1.298 | 0.96      | 1.755     | 0.0897  |
| 78                                                | 124  | ≥80         | 0.834 | 0.525     | 1.325     | 0.4417  |
| All-cause mortality and all-cause hospitalization |      |             |       |           |           |         |
|                                                   | 3164 | Whole Study | 0.884 | 0.818     | 0.955     |         |
| 438                                               | 595  | <55         | 0.839 | 0.694     | 1.014     | 0.0687  |
| 317                                               | 395  | 55–59       | 0.867 | 0.692     | 1.086     | 0.2128  |
| 462                                               | 578  | 60–64       | 0.883 | 0.734     | 1.062     | 0.1875  |
| 513                                               | 608  | 65–69       | 0.906 | 0.762     | 1.078     | 0.2677  |
| 472                                               | 551  | 70–74       | 0.901 | 0.752     | 1.08      | 0.2592  |
| 276                                               | 313  | 75–79       | 0.902 | 0.712     | 1.143     | 0.3922  |
| 110                                               | 124  | ≥80         | 0.859 | 0.583     | 1.267     | 0.4434  |

\*96.1% CI.

consistent interaction between treatment and gender, cause of heart failure and/or previous ischaemic heart disease, baseline ejection fraction, NYHA class, systolic blood pressure and heart rate at entry, previous myocardial infarction, previous atrial fibrillation, or any other baseline laboratory finding. In most subgroups, the hazard ratios were below 1. The few exceptions occurred in subgroups with relatively few events, and few deviations gave concordant results for the two major end-points, indicating that the treatment effect seen in the whole study was not influenced by any of these subgroups. An exception was seen with serum sodium. Higher levels of serum sodium were associated with decreased risk of death from any cause in the high-dose lisinopril group.

Figure 2 shows the influence of age in 5-year bands on the hazard ratio for high-dose vs low-dose lisinopril for all-cause mortality and mortality plus hospitalization. For all-cause mortality and all-cause hospitalization, there was no effect of age on outcome, with uniform hazard ratios in the different age bands. The hazard ratio for the 75–79 age group was above 1.0 for the all-cause mortality end-point, although this was not statistically significant. Moreover it was not concordant with the findings for patients ≥80 years or with the results for death plus hospitalizations in the 75–79 age group. Analysis using age as a continuous covariate also showed no interaction between age and treatment.

The effect of concurrent medications at randomization is shown in Fig. 3. For all subgroups the confidence interval overlaps that for the study as a whole, indicating that none of the subgroups behave differently to the overall study population.

### Diabetic patients

Of the 3164 patients in the study, only the 611 (19%) receiving hypoglycaemic agents (oral or insulin) at baseline were considered as having clinical diabetes mellitus. The mean age of these patients was  $65 \pm 9$  years and 78% were male. The cause of heart failure in this diabetic group was predominately ischaemic heart disease (71%), with dilated cardiomyopathy reported in 23%. Thus the diabetic patients had similar reasons for heart failure as the non-diabetic cohort (ischaemic heart disease 64% and dilated cardiomyopathy 28%). All-cause mortality was 49% among the diabetic patients compared with 42% in the non-diabetic group, while the occurrence of combined end-point of mortality plus need for hospitalization was 88% vs 80%, for the diabetic and non-diabetic groups respectively. Kaplan–Meier survival curves are shown in Fig. 4.

The relative risk reduction in mortality for high-dose vs low-dose lisinopril was 14% for patients with diabetes mellitus and 6% for those without; for mortality plus hospitalization risk reductions were 4% and 14%, respectively. The interaction *P*-values for these subgroups were, however, not significant (mortality,  $P=0.502$ ; mortality plus hospitalization,  $P=0.275$ ), so diabetic patients responded to high-dose lisinopril as well as non-diabetics.

Diabetic patients were hospitalized more often than non-diabetics as would be expected, but high-dose lisinopril reduced the number of hospitalizations and days in hospital per patient to a greater extent in diabetic than in non-diabetic patients (Table 2). Over one-third of all admissions and days in hospital were for heart failure. High-dose lisinopril was more effective than



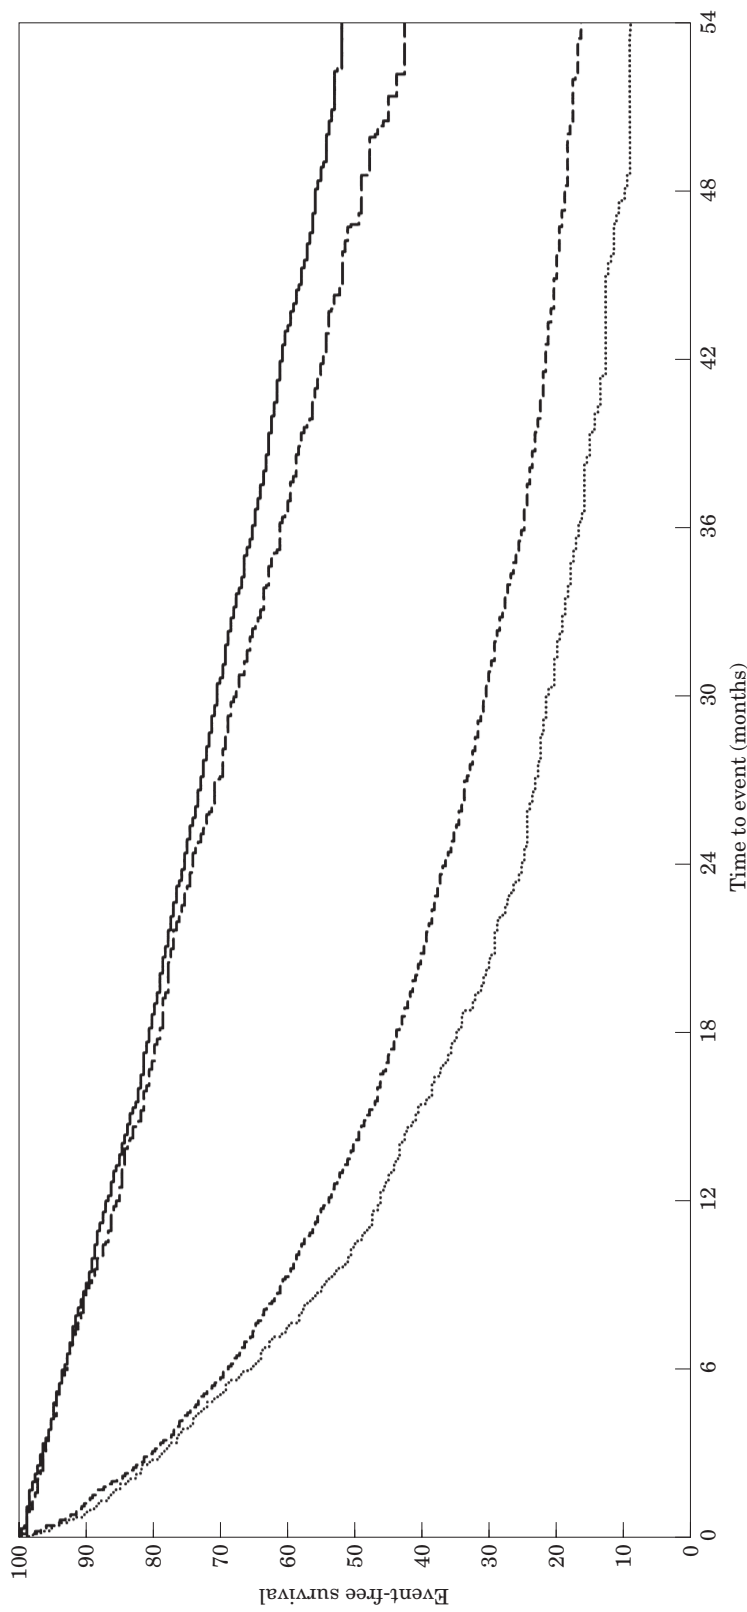

Figure 4 All-cause mortality and all-cause mortality plus need for hospitalization by any reason in patients with and without diabetes mellitus. — = All cause mortality/non-diabetic; - - - = all cause mortality/diabetic; - · - = all cause mortality and hospitalization/non-diabetic; · · · = all cause mortality and hospitalization/diabetic.

**Table 2** Number of hospitalizations per patient and days in hospital for patients with or without diabetes receiving high- or low-dose lisinopril

|                             | High-dose lisinopril<br>(n=1568) |               | Low-dose lisinopril<br>(n=1596) |               |
|-----------------------------|----------------------------------|---------------|---------------------------------|---------------|
|                             | Diabetics                        | Non-diabetics | Diabetics                       | Non-diabetics |
| Total patients n            | 314                              | 1254          | 297                             | 1299          |
| Hospitalizations/patient    | 3.0                              | 2.2           | 3.5                             | 2.5           |
| Days in hospital/patient    | 21.4                             | 17.7          | 29.1                            | 21.0          |
| Hospitalized patients n (%) | 254 (81)                         | 874 (70)      | 239 (80)                        | 958 (74)      |
| Hospitalizations/patient    | 3.7                              | 3.2           | 4.3                             | 3.4           |
| Days in hospital/patient    | 26.5                             | 25.4          | 36.2                            | 28.5          |

low-dose in reducing the number of days in hospital for heart failure in diabetic patients (by 27%): high-dose lisinopril was as effective in reducing hospitalizations per patient for heart failure in diabetic patients as in non-diabetic populations (21% vs 24%).

### Tolerability

The tolerability of high-dose lisinopril was similar for patients with and without diabetes with respect to cough (12% and 10% respectively), renal dysfunction (29% vs 22%) and hypotension (35% vs 32%).

High-dose lisinopril was tolerated slightly better than low-dose in both young and elderly patients (Table 3) and although more elderly than younger patients were withdrawn from study treatment, more were withdrawn from low-dose treatment. There was a trend for more hypotension/dizziness and renal dysfunction/hyperkalaemia with high-dose lisinopril (Table 4).

### Discussion

In this population of patients with advanced heart failure, high-dose lisinopril reduced overall mortality by 8% and hospitalization by 12%, compared with low-dose lisinopril, as previously reported<sup>[7]</sup>. The characteristics and numbers of adverse events were similar between treatment groups and typical of ACE inhibitors. In this

**Table 3** Patient withdrawals by lisinopril dose and age group

| Age at entry (years) | Percentage of patients withdrawn from therapy |          |
|----------------------|-----------------------------------------------|----------|
|                      | High dose                                     | Low dose |
| <70                  | 24.5                                          | 28.8     |
| 70–74                | 33.6                                          | 34.7     |
| >75                  | 31.2                                          | 35.2     |
| Overall              | 27.1                                          | 30.7     |

analysis, findings in high-risk patients were consistent with the overall results, suggesting a reduction in mortality and morbidity with high-dose lisinopril.

In patients with hypotension, and thus more advanced myocardial dysfunction, high-dose lisinopril was as effective as in the overall study population in terms of mortality reduction. In general, patients with an increased mortality risk are those with low serum sodium or increased creatinine at baseline, aged over 70, or with ischaemic heart disease. For all-cause mortality, the hazard ratio for the 75–79 age group appears as a single high outlying value (Fig. 2) with a wide confidence interval which crosses 1.0 and overlaps the confidence intervals for the other groups: there is thus no evidence that these patients respond less well to high-dose lisinopril. Thus age did not influence the effect of treatment. There were no consistent interactions between creatinine or potassium values and treatment effect. The high hazard ratio for baseline sodium  $<137 \text{ mmol} \cdot \text{l}^{-1}$  for mortality does not appear to indicate a genuine safety hazard, because the 95% CI overlaps the result for the study as a whole and the hazard ratio for the other end-point of combined

**Table 4** Incidence (percentage) of possible dose-related side effects in high-risk subgroups

|                                         | High-dose | Low-dose |
|-----------------------------------------|-----------|----------|
| (A) Hypotension/dizziness               |           |          |
| Receiving hypoglycaemic agents on entry |           |          |
| yes                                     | 34.7      | 21.2     |
| no                                      | 32.2      | 22.3     |
| Age                                     |           |          |
| $\geq 70$ years                         | 36.8      | 24.8     |
| $< 70$ years                            | 30.7      | 21.0     |
| (B) Renal dysfunction/hyperkalaemia     |           |          |
| Receiving hypoglycaemic agents on entry |           |          |
| yes                                     | 28.7      | 21.2     |
| no                                      | 21.5      | 15.2     |
| Age                                     |           |          |
| $\geq 70$ years                         | 32.2      | 21.7     |
| $< 70$ years                            | 18.5      | 15.3     |

mortality plus hospitalizations is considerably below 1.0. When sodium is treated as a continuous covariate, analysis shows no interaction with treatment.

Thus, none of these factors altered the treatment effect: high-dose lisinopril was still more effective than low-dose lisinopril in these high-risk patients. However, there is a consistent pattern suggesting that for both mortality and mortality plus hospitalization, patients who were not receiving calcium channel blockers, nitrates, vasodilators and beta-blockers (each considered separately) seemed to derive greater benefit from high-dose lisinopril than patients receiving these medications (Fig. 3). This suggests that high-dose lisinopril is even more necessary and beneficial in heart failure patients who cannot, for whatever reason, be treated with other medications.

Patients taking hypoglycaemic medications at baseline were assumed to have clinical diabetes mellitus. It was not possible to distinguish between type I and type II diabetes; however, the vast majority of patients (at least 90%) can be assumed to have type II diabetes. High-dose lisinopril was as effective in these patients as in the overall study population in reducing mortality. The reduction in mortality in patients with diabetes was 14%, compared with 8% in the overall population. However, the confidence intervals were wide and the interaction not significant ( $P=0.502$ ), and therefore high-dose lisinopril is similarly effective in both diabetic and non-diabetic patients.

Although the percentage reductions in the combined end-point of all-cause mortality and all-cause hospitalizations were smaller in the diabetic subgroup than in non-diabetic patients (4% vs 14%), this difference was also not statistically significant. The data in Table 2 show a generally consistent tendency towards greater reductions in various measures of hospitalizations with high-dose lisinopril in diabetic patients. These data show that high-dose lisinopril is more effective than low-dose lisinopril in the diabetic population, as it is in the non-diabetic population and in the overall study population. In addition, since diabetic patients are generally more severely ill than non-diabetic patients, and lisinopril has beneficial effects in diabetic nephropathy<sup>[17]</sup> and retinopathy<sup>[18]</sup>, the benefits of high-dose treatment may be proportionately greater in diabetic subjects.

As this is a retrospective subgroup analysis, the conclusions that can be drawn from this analysis are limited. However, it can be seen that high-dose lisinopril is as effective in high-risk populations as in the overall study population. In addition, although the criteria for diabetes mellitus were poorly defined (as in most other similar trials), the data show a number of interesting trends, particularly larger reductions in days in hospital for heart failure in these patients.

## Conclusion

The results of this subanalysis are of value for the practising physician. They show that in subgroups of

heart failure patients at high risk, high-dose lisinopril is well-tolerated and at least as effective as in the overall study population, with significant reductions in mortality and morbidity. The results show that it will generally be advantageous to up-titrate lisinopril in these high-risk patients, to gain the mortality and morbidity benefits seen in the overall population of the ATLAS study.

Supported by grants from AstraZeneca, Alderley Park, Macclesfield, UK. The authors would like to thank all the clinical sites, the investigators and the ATLAS Data and Safety Monitoring Board for their participation in this trial. A full list of the investigators participating in this study and members of the Data and Safety Monitoring Board has been published by Packer *et al.*<sup>[7]</sup>.

## References

- 1] The CONSENSUS Trial Study Group. Effects of enalapril on mortality in severe congestive heart failure. *N Engl J Med* 1987; 316: 1429–35.
- 2] Cohn JN, Archibald DG, Ziesche S *et al.* Effect of vasodilator therapy on mortality in chronic congestive heart failure. *N Engl J Med* 1986; 314: 1547–52.
- 3] The SOLVD Investigators. Effect of enalapril on survival in patients with reduced left ventricular ejection fractions and congestive heart failure. *N Engl J Med* 1991; 325: 293–302.
- 4] The Acute Infarction Ramipril Efficacy (AIRE) study investigators. Effect of ramipril on mortality and morbidity of survivors of acute myocardial infarction with clinical evidence of heart failure. *Lancet* 1993; 342: 821–8.
- 5] Cleland JGF, Poole-Wilson PA. ACE inhibitors for heart failure: a question of dose. *Br Heart J* 1994; 72 (3 Suppl): S100–6.
- 6] Packer M. Do angiotensin-converting enzyme inhibitors prolong life in patients with heart failure treated in clinical practice? *J Am Coll Cardiol* 1996; 28: 1323–7.
- 7] Packer M, Poole-Wilson PA, Armstrong PW *et al.* Comparative effects of low doses and high doses of the angiotensin converting-enzyme inhibitor, lisinopril, on morbidity and mortality in chronic heart failure. *Circulation* 1999; 100: 1–7.
- 8] Saxon LA, Stevenson WG, Middlekauff HR *et al.* Predicting death from progressive heart failure secondary to ischemic or idiopathic dilated cardiomyopathy. *Am J Cardiol* 1993; 72: 62–5.
- 9] Madsen BK, Hansen JF, Stokholm KH *et al.* Chronic congestive heart failure. Description and survival of 190 consecutive patients with a diagnosis of chronic congestive heart failure based on clinical signs and symptoms. *Eur Heart J* 1994; 15: 303–10.
- 10] Verhaeverbeke I, Mets T. Drug-induced orthostatic hypotension in the elderly: avoiding its onset. *Drug Saf* 1997; 17: 105–18.
- 11] Oster JR, Materson BJ. Renal and electrolyte complications of congestive heart failure and effects of therapy with angiotensin-converting enzyme inhibitors. *Arch Intern Med* 1992; 152: 704–10.
- 12] Hoyer J, Schulte KL, Lenz T. Clinical pharmacokinetics of angiotensin converting enzyme (ACE) inhibitors in renal failure. *Clin Pharmacokinet* 1993; 24: 230–54.
- 13] Packer M, Lee WH, Kessler PD. Preservation of a glomerular filtration rate in human heart failure by activation of the rennin-angiotensin system. *Circulation* 1986; 74: 766–74.
- 14] Amato L, Paolisso G, Cacciatore F *et al.* Congestive heart failure predicts the development of non-insulin-dependent diabetes mellitus in the elderly. The Osservatorio Geriatrico Regione Campania Group. *Diabetes Metab* 1997; 23: 213–8.

- [15] Massie BM, Cleland JG, Armstrong PW *et al.* Regional differences in the characteristics and treatment of patients participating in an international heart failure trial. *J Card Fail* 1998; 4: 3–8.
- [16] Cleland JGF, Armstrong P, Horowitz JD *et al.* Baseline clinical characteristics of patients recruited into the assessment of treatment with lisinopril and survival study. *Eur J Heart Fail* 1999; 1: 73–9.
- [17] The EUCLID Study Group. Randomised placebo-controlled study of lisinopril in normotensive patients with insulin-dependent diabetes and normoalbuminuria or microalbuminuria. *Lancet* 1997; 349: 1787–92.
- [18] Chaturvedi N, Sjolie A-K, Stephenson JM *et al.* Effect of lisinopril on progression of retinopathy in normotensive people with type 1 diabetes. *Lancet* 1998; 351: 28–31.
